# Supplementary material
Source: PubMed Central journal article supplement (PMC8895315)
Supplement: jamaoncol-e218116-s001.pdf [file jamaoncol-e218116-s001.pdf]

## Supplementary Online Content

Leapman MS, Dinan M, Pasha S, et al. Mediators of racial disparity in the use of prostate magnetic resonance imaging among patients with prostate cancer.

*JAMA Oncol.* Published online March 3, 2022. doi:10.1001/jamaoncol.2021.8116

### **eMethods.**

**eTable 1.** Selection Process for Variables Meeting Conditions for Mediation

**eTable 2.** Procedure Codes Used to Identify Prostate Imaging Procedures

### **eReferences.**

This supplementary material has been provided by the authors to give readers additional information about their work.

## eMethods.

Mediation effects refer to those contributed by an intervening variable within a relationship between the exposure and outcome of interest.<sup>1</sup> In this study, we sought to explain the effects of race on the use of prostate MRI, and specifically how the association can be explained through (1) the effects of race on a hierarchy of clinical and sociodemographic factors and, in turn, on prostate MRI use; and (2) determining whether the association between race and prostate MRI use persist after adjusting for the effects of potential mediators.

We used a generalized approach to mediation under the counterfactual framework. This approach seeks to examine the potential difference in outcomes ( $Y_i$ ) that would occur if the exposure variable could be changed while other conditions being held constant (i.e., the difference in receipt of prostate MRI if a given patient belonged to the race group conceptualizes as “White” ( $x$ ) versus “Black” ( $x'$ )). Thus, we aimed to appreciate the average causal effects of race over a population of patients  $E(Y_i(x)) - (Y_i(x'))$ .<sup>2</sup>

We further sought to decompose the total effects into those contributed by the exposure variable (race) as well as those contributed indirectly by the mediators (a hierarchy of clinical and sociodemographic factors including racialized residential segregation defined by the Index of Concentrations at the Extremes for race).

We evaluated the relationships among these exposure, outcome and potential mediating variables using predictive models using a previously described method and software package (*mma*) which operationalizes several algorithms to estimate mediation effects (Comprehensive R Archive Network (CRAN)). This approach has been applied for mediation analyses, including those examining racial disparity in breast cancer.<sup>3</sup> Based on the binary and categorical nature of the study variables, as well as the possibility of complex hierarchies and nonlinear relationships, we elected to use non-linear approaches. The prediction method employed in the *mma* software utilizes Multiple Additive Regression Trees (MART) an application of gradient tree boosting, an approach that sequentially applies a classification algorithm to a set of data which has been applied in predictive data mining. As described by Yu and Li (*mma: An R Package for Mediation Analysis with Multiple Mediators*), the *mma* software package integrates several steps to identify potential mediators and estimate mediation effects, as follows<sup>4,5</sup>:

We first identified mediators based on the following conditions: (1) potential mediators must be associated with the exposure variable (race), and (2) must also be associated with the outcome (prostate MRI use). We tested these conditions using chi-square statistics or analysis of variance for categorical and continuous variables, respectively using a significance level ( $\alpha=0.1$ ). The putative sociodemographic and clinical variables were entered simultaneously and tested for meeting the specified conditions of mediation. Based on their associations with race and prostate MRI receipt, SEER region, HRR-level prostate imaging utilization, Medicare-Medicaid dual eligibility,  $ICE_{\text{race}}$  category, and high area-level poverty met criteria as mediators. In the model comprised of patients whose race was conceptualized as ‘Black’ and ‘Other,’ SEER-region,  $ICE_{\text{race}}$  category, high area-level poverty, and HRR-level prostate cancer imaging utilization met criteria as mediators. Dual Medicaid eligibility did not meet criteria as a mediator but was included as a covariate.

| <b>eTable 1.</b> Selection Process for Variables Meeting Conditions for Mediation                                                                                                                                                                                                                                                                                                                                               |                          |                          |
|---------------------------------------------------------------------------------------------------------------------------------------------------------------------------------------------------------------------------------------------------------------------------------------------------------------------------------------------------------------------------------------------------------------------------------|--------------------------|--------------------------|
| Candidate Mediator Variable                                                                                                                                                                                                                                                                                                                                                                                                     | Step 1<br><i>p-value</i> | Step 2<br><i>p-value</i> |
| <b>Race: Black versus White</b>                                                                                                                                                                                                                                                                                                                                                                                                 |                          |                          |
| SEER Region*                                                                                                                                                                                                                                                                                                                                                                                                                    | <0.001                   | <0.001                   |
| Dual eligibility for Medicaid*                                                                                                                                                                                                                                                                                                                                                                                                  | <0.001                   | <0.001                   |
| ICE <sub>race</sub> category*                                                                                                                                                                                                                                                                                                                                                                                                   | 0.005                    | <0.001                   |
| High poverty area*                                                                                                                                                                                                                                                                                                                                                                                                              | <0.001                   | <0.001                   |
| HRR-level imaging use*                                                                                                                                                                                                                                                                                                                                                                                                          | <0.001                   | 0.037                    |
| CAPRA score                                                                                                                                                                                                                                                                                                                                                                                                                     | 0.157                    | N/A                      |
| <b>Race: Black versus Other</b>                                                                                                                                                                                                                                                                                                                                                                                                 |                          |                          |
| SEER Region*                                                                                                                                                                                                                                                                                                                                                                                                                    | <0.001                   | <0.001                   |
| Dual eligibility for Medicaid                                                                                                                                                                                                                                                                                                                                                                                                   | 0.002                    | 0.685                    |
| ICE <sub>race</sub> category*                                                                                                                                                                                                                                                                                                                                                                                                   | 0.020                    | <0.001                   |
| High poverty area*                                                                                                                                                                                                                                                                                                                                                                                                              | 0.001                    | <0.001                   |
| HRR-level imaging use*                                                                                                                                                                                                                                                                                                                                                                                                          | 0.035                    | <0.001                   |
| CAPRA score                                                                                                                                                                                                                                                                                                                                                                                                                     | 0.474                    | N/A                      |
| Step 1: Univariate test of association between variable and outcome (prostate MRI)<br>Step 2: Univariate test of association between variable and predictor (race)<br>*Indicates variable meeting criteria for mediator<br><i>Abbreviations:</i> SEER=Surveillance, Epidemiology and End-Results; ICE=Index of Concentrations at the Extremes; HRR=Hospital Referral Region; CAPRA=Cancer of the Prostate Risk Assessment Score |                          |                          |

We subsequently used the “*med*” argument to generate point estimates for mediation effects using nonlinear methods under the Bernoulli probability distribution. These models assumed independent mediation effects. We reported the direct and indirect association of race with MRI receipt through log-odds and relative effects (%) using 100 bootstrap iterations to accommodate uncertainty of the estimates. The relative effects were calculated as the ratio of indirect or direct effects divided by the total effect. Lastly, we generated figures depicting the direct, indirect, and total effects of the mediators.

**eTable 2.** Procedure Codes Used to Identify Prostate Imaging Procedures

|              | Healthcare Common Procedure Coding                           | International Classification of Diseases, Ninth Revision | International Classification of Diseases, Tenth Revision                                                                                                                                                                                                                                          |
|--------------|--------------------------------------------------------------|----------------------------------------------------------|---------------------------------------------------------------------------------------------------------------------------------------------------------------------------------------------------------------------------------------------------------------------------------------------------|
| Prostate MRI | 72195, 72196, 72197                                          | 8895                                                     | BV33Y0Z,<br>BV33YZZ,<br>BV33ZZZ,<br>BW3GY0Z,<br>BW3GYZZ,<br>BW3GZZZ                                                                                                                                                                                                                               |
| Bone scan    | 78306, 78315, 78102,<br>78103, 78104                         | 92.14                                                    | CP111ZZ, CP11YZZ,<br>CP141ZZ, CP14YZZ,<br>CP151ZZ, CP15YZZ,<br>CP161ZZ, CP16YZZ,<br>CP171ZZ, CP17YZZ,<br>CP181ZZ, CP18YZZ,<br>CP191ZZ, CP19YZZ,<br>CP1B1ZZ, CP1BYZZ,<br>CP211ZZ, CP21YZZ,<br>CP221ZZ, CP22YZZ,<br>CP231ZZ, CP23YZZ,<br>CP241ZZ, CP24YZZ,<br>CP261ZZ, CP26YZZ,<br>CP271ZZ, CP27YZZ |
| CT abdomen   | 72191, 72192, 72193,<br>72194, 74150, 74160,<br>74170, 74175 | 88.01                                                    | BW2000Z,<br>BW200ZZ,<br>BW2010Z,<br>BW201ZZ,<br>BW20Y0Z,<br>BW20YZZ,BW20ZZZ                                                                                                                                                                                                                       |
| Body scan    | N/A                                                          | 92.18                                                    | CW1N1ZZ,<br>CW1NDZZ,<br>CW1NFZZ,<br>CW1NGZZ,<br>CW1NLZZ,<br>CW1NSZZ,<br>CW1NYZZ,<br>CW3NYZZ'                                                                                                                                                                                                      |

## eReferences.

1. Baron RM, Kenny DA. The moderator-mediator variable distinction in social psychological research: conceptual, strategic, and statistical considerations. *Journal of personality and social psychology*. 1986;51(6):1173-1182.
2. Holland PW. Statistics and Causal Inference. *Journal of the American Statistical Association*. 1986;81(396):945-960.
3. Yu Q, Wu X, Li B, Scribner RA. Multiple mediation analysis with survival outcomes: With an application to explore racial disparity in breast cancer survival. *Statistics in medicine*. 2019;38(3):398-412.
4. Yu Q, Scribner RA, Leonardi C, et al. Exploring racial disparity in obesity: A mediation analysis considering geo-coded environmental factors. *Spatial and spatio-temporal epidemiology*. 2017;21:13-23.
5. Yu Q LB. mma: An R Package for Mediation Analysis with Multiple Mediators. . *Journal of Open Research Software*. 2017; 2017;5(1):11. .
